RESEARCH ARTICLE

# From ADHD symptoms to parental stress: The roles of functional impairment, family functioning, and parental ADHD

Nitchawan Jongrakthanakij , Thanavadee Prachason \*, Nida Limsuwan, Komsan Kiatrungrit, Masatha Thongpan, Passaporn Lorterapong, Pattarabhorn Wisajun, Sudawan Jullagate

Department of Psychiatry, Faculty of Medicine Ramathibodi Hospital, Mahidol University, Bangkok, Thailand

\* [thanavadee.pra@mahidol.edu](mailto:thanavadee.pra@mahidol.edu)

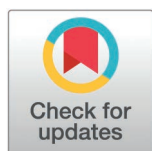

## Abstract

### Background

Raising a child with Attention-Deficit/Hyperactivity Disorder (ADHD) is associated with significant parental stress. However, the complex relationships between factors in the child and family in shaping this stress are not well understood. This study aimed to elucidate these interrelationships and identify the key determinants of parental stress.

### Methods

A cross-sectional study included 127 children and adolescents with ADHD (70.9% males; mean age  $9.6 \pm 3.3$  years) and their caregivers, recruited from the ADHD Registry at Ramathibodi Hospital, Bangkok (2019–2023). Caregivers completed standardized measures of parental stress, child ADHD symptoms, child functional impairment, family functioning, and parental ADHD symptoms. Structural equation modeling was used to examine pathways from child and parental ADHD symptoms to parental stress, with functional impairment and family functioning specified as mediators.

### Results

Examining child- and family-related factors separately, child ADHD symptoms indirectly influenced parental stress via functional impairment, whereas parental ADHD symptoms significantly influenced parental stress both directly and indirectly via family functioning. In the integrated model examining both child- and family-related factors concurrently, the direct and indirect pathways from parental ADHD symptoms to parental stress via family functioning remained significant, but not the pathway from child ADHD symptoms to parental stress via functional impairment.

## OPEN ACCESS

**Citation:** Jongrakthanakij N, Prachason T, Limsuwan N, Kiatrungrit K, Thongpan M, Lorterapong P, et al. (2026) From ADHD symptoms to parental stress: The roles of functional impairment, family functioning, and parental ADHD. *PLoS One* 21(1): e0341817. <https://doi.org/10.1371/journal.pone.0341817>

**Editor:** Gerard Hutchinson, University of the West Indies at Saint Augustine, TRINIDAD AND TOBAGO

**Received:** November 17, 2025

**Accepted:** January 13, 2026

**Published:** January 28, 2026

**Peer Review History:** PLOS recognizes the benefits of transparency in the peer review process; therefore, we enable the publication of all of the content of peer review and author responses alongside final, published articles. The editorial history of this article is available here: <https://doi.org/10.1371/journal.pone.0341817>

**Copyright:** © 2026 Jongrakthanakij et al. This is an open access article distributed under the terms of the [Creative Commons Attribution](https://creativecommons.org/licenses/by/4.0/)

[License](#), which permits unrestricted use, distribution, and reproduction in any medium, provided the original author and source are credited.

**Data availability statement:** De-identified data supporting the findings of this study have been deposited in the Open Science Framework (OSF) and are publicly available at <https://osf.io/b9r5s/>. All data were anonymized to protect the identities of the individuals involved.

**Funding:** The author(s) received no specific funding for this work.

**Competing interests:** The authors have declared that no competing interests exist.

## Conclusions

Functional impairment, parental ADHD, and family functioning, rather than child ADHD symptoms, are key determinants of parental stress in families of children with ADHD. These factors should be routinely assessed and targeted to alleviate parental stress more effectively than focusing on child ADHD symptoms alone.

## Introduction

Attention-deficit/hyperactivity disorder (ADHD) is a common neurodevelopmental disorder characterized by persistent patterns of inattention, hyperactivity, and impulsivity. The global prevalence of ADHD was estimated to be 7.6% in children and 5.6% in adolescents [1]. ADHD is associated with significant functional impairments, including difficulties in peer relationships, academic underachievement, and challenges in daily activities, which not only affect the children themselves but also their families [1–3].

Parental stress is conceptualized as an imbalance between the demands of caregiving and a parent's perceived ability to cope [4]. While a certain degree of stress is inherent to the parenting role [5], chronic or excessive stress poses significant risks to the well-being of both parents and children. For parents, elevated stress is a predictor of poorer mental health outcomes, less effective parenting practices, and weakened parent-child relationships [6–10]. In children, parental stress is associated with emotional and behavioral difficulties, impaired socio-emotional development, and reduced social competence [10–13]. These findings highlight the importance of identifying modifiable contributors to parental stress that could be targeted to enhance family well-being.

Parenting a child with ADHD is associated with substantially elevated parental stress. The disorder's emotional and behavioral manifestations, ranging from frequent emotional outbursts to persistent academic difficulties, impose considerable demands on caregivers [14–19]. Previous research has consistently demonstrated that higher symptom severity is associated with greater parental stress, reduced family functioning, and increased caregiver burden [15,20–24]. Additionally, related functional impairments, such as noncompliance, organizational difficulties, and sustained attention deficits, further exacerbate caregiver stress [25].

Beyond child-related factors, family functioning has been reported to be another critical determinant of parental stress. Families of children with ADHD frequently exhibit reduced cohesion, strained parent-child interactions, and elevated marital conflict [26–28]. Due to a high heritability of ADHD, such family dynamics are usually compounded by the presence of parental ADHD symptoms that frequently contribute to occupational instability and interpersonal problems [8,26,29–31], creating a more complex and stressful family environment that could be passed on from generation to generation.

Although prior research [8,32–34] has examined the influence of child and parental ADHD symptoms, functional impairment, and family functioning on parental stress, these factors have often been studied in isolation. Their combined effects, particularly

through potential mediating pathways, remain poorly understood. The present study aimed to address this gap by applying structural equation modeling (SEM) to examine the contributions of both child- and family-related factors to parental stress within families affected by ADHD. For child-related factors, we hypothesized that child functional impairment would be a mediator between child ADHD symptoms and parental stress. For family-related factors, we hypothesized that family functioning would mediate the pathway from parental ADHD symptoms to parental stress. To examine the joint effects, both child- and family-related factors were integrated in the final path model to parental stress. Such insights would be a stepping stone to developing targeted, evidence-based interventions to mitigate parental stress and optimize treatment outcomes, not only for children with ADHD, but also for the entire family unit.

## Materials and methods

### Study design and participants

This cross-sectional study utilized baseline data from the ADHD Registry of the Department of Psychiatry at Ramathibodi Hospital, Bangkok, Thailand, a longitudinal cohort that consecutively enrolled children and adolescents suspected of having ADHD who first visited the psychiatric outpatient unit from October 2019 to October 2023. Children and adolescents who were unable to communicate in Thai were excluded. After informed written assent and consent were obtained from the participants and their parents, respectively, child and adolescent psychiatrists or psychiatry residents performed comprehensive clinical interviews with both the children and their caregivers to determine the diagnoses for the presenting problems as part of routine clinical care. A checklist of the DSM-5 criteria for ADHD [35] was recorded. The diagnosis of ADHD was defined as the presence of  $\geq 6$  symptoms in either the inattention or hyperactivity/impulsivity domains, beginning before age 12, present in at least two settings, and causing functional impairment. Children were excluded if symptoms occurred only during a psychotic disorder or were better explained by another psychiatric condition or substance use. Comorbidity identified at the initial visit was also recorded. Caregivers provided demographic and personal information (age, sex, living arrangements, marital status, education level, and family monthly income) and completed standardized questionnaires assessing parental stress, child ADHD symptoms, child functional impairment, family functioning, and parental ADHD symptoms. Multiple follow-up assessments were conducted over a one-year period after the initial visit. The Ethics Committee of Ramathibodi Hospital, Mahidol University, approved the data collection protocol of the registry (MURA2019/815).

For the present study, we retrieved anonymized baseline data from the ADHD registry comprising 164 children and adolescents who met the DSM-5 diagnostic criteria of ADHD. Only participants with available data on parental stress were included in this study because it was the primary outcome variable in the structural equation modeling. The sample with over 20% missing items of any questionnaire used in the models was excluded from the related analysis. The final sample for the main analyses comprises 127 participants. The characteristics of the excluded sample were not significantly different from the included sample (S1 Table). The Ethics Committee of Ramathibodi Hospital, Mahidol University, waived the requirement for informed consent to use the de-identified data for this study (MURA2025/340).

### Measures

**Parental stress.** The Perceived Stress Scale–10 (PSS-10) is a 10-item self-report instrument assessing the degree to which individuals perceive their lives as stressful [36]. Respondents rate how often they have experienced specific thoughts or feelings over the past month on a 5-point Likert scale (0 = never to 4 = very often). Total scores range from 0 to 40, with higher scores indicating greater perceived stress. The Thai version PSS-10 has demonstrated good reliability and validity in Thai populations [37] and demonstrated acceptable internal consistency in the present study, with a Cronbach's alpha of 0.73.

**Child ADHD symptoms.** The Swanson, Nolan, and Pelham IV Scale (SNAP-IV) is a 26-item parent-report and teacher-report measure used to assess ADHD symptoms of inattention and hyperactivity/impulsivity, as well

as oppositional defiant disorder (ODD) symptoms [38,39]. Each item is rated on a four-point scale, from 0 (not at all) to 3 (very much). A composite ADHD symptom score was derived by summing the inattentive and hyperactive/impulsive subscales, with higher scores indicating greater severity. The SNAP-IV is widely used in clinical and research settings to screen baseline symptoms, monitor treatment progress, and evaluate outcomes [40]. The Thai version has demonstrated strong validity and reliability [41]. In this study, internal consistency was excellent (Cronbach's  $\alpha = 0.92$ ).

**Child's functional impairments.** The Weiss Functional Impairment Rating Scale-Parent (WFIRS-P) is a 50-item parent-rated instrument designed to assess the impact of ADHD symptoms on a child's daily functioning [42]. Items are rated on a 4-point Likert scale (0 = not at all/never to 3 = very much/very often), with an additional "not applicable" option. Higher total scores indicate greater functional impairment. The Thai version of the WFIRS-P has demonstrated strong reliability and validity, [43]. In this study, internal consistency was excellent (Cronbach's  $\alpha = 0.91$ ).

**Family functioning.** The Systemic Clinical Outcome and Routine Evaluation (SCORE-15) is a 15-item self-report questionnaire for family members aged 12 years and older. Items are rated on a 5-point Likert scale (1 = "describes us very well" to 5 = "describes us not at all"), with higher scores indicating poorer family functioning [44]. The SCORE-15 has demonstrated good reliability and validity in the Thai population [45,46]. In this study, internal consistency was good (Cronbach's  $\alpha = 0.88$ ).

**Parental ADHD.** The Adult ADHD Self-Report Scale Screener V1.1 (ASRS-v1.1) is an 18-item self-report instrument assessing ADHD symptoms in adults [47–49]. Items are rated on a 5-point Likert scale from "never" to "very often," with total scores ranging from 0 to 72; higher scores indicate greater symptom severity. The Thai version ASRS-v1.1 has been shown to be psychometrically reliable and valid for screening adult ADHD in Thai populations [50]. In this study, internal consistency was excellent (Cronbach's  $\alpha = 0.94$ ).

## Statistical analysis

All analyses were conducted using Stata version 18. To maximize the power of analysis, we calculated the PSS-10, SNAP-IV, WFIRS-P, SCORE-15, and ASRS-v1.1 scores by averaging all available items in each questionnaire if the number of missing items did not exceed 20%. This approach ensures that only valid data are used for scoring while minimizing potential bias due to missing information. Sample characteristics were summarized using descriptive statistics. Spearman correlation analyses were performed to examine relationships between parental stress (PSS-10), child ADHD symptoms (SNAP-IV), functional impairments (WFIRS-P), family functioning (SCORE-15), and parental ADHD symptoms (ASRS-v1.1). To examine pathways from parental and child ADHD symptoms to parental stress, structural equation modeling (SEM) was employed. Three mediated linear regression models were tested, with parental stress as the dependent variable. First, to examine the influence of child-related factors, child ADHD symptoms were specified as the independent variable, and child functional impairment as the mediator. Second, to examine the influence of family-related factors, parental ADHD symptom was specified as the independent variable, and family functioning as the mediator. Finally, to examine the joint influences of child- and family-related factors, the first two models were combined, with child and parental ADHD symptoms as the independent variables, and child functional impairment and family functioning as the mediators. As family functioning might also influence perceived functional impairment [51], we added a mediating path from family functioning to child functional impairment to the model. Standardized z-scores were used to facilitate direct comparisons between variables. Model fit was evaluated using the Comparative Fit Index (CFI), the Root Mean Square Error of Approximation (RMSEA), and the Standardized Root Mean Square Residual (SRMR). Acceptable fit was defined as  $CFI \geq 0.95$ ,  $RMSEA \leq 0.08$ , and  $SRMR \leq 0.08$  [52–54]. Primary analyses were adjusted for the child's age and sex. To assess the robustness of the findings, multiple sensitivity analyses were performed: 1) additionally controlling for family income or comorbid specific learning disorder, or 2) using only participants with complete questionnaire data. Statistical significance was set at  $p < 0.05$  (two-tailed).

## Results

### Sample characteristics

The sample comprised 90 males (70.9%) and 37 females (20.1%), with mean age of  $9.6 \pm 3.3$  years. ADHD presentations were predominantly inattentive ( $n=56$ , 44.1%) or combined ( $n=55$ , 43.3%), with hyperactive-impulsive presentation being the least common ( $n=16$ , 12.6%). Caregivers were primarily mothers ( $n=96$ , 81.4%), and most children lived with married parents ( $n=66$ , 58.9%). The majority of parents held a bachelor's degree or higher (mothers:  $n=88$ , 74.0%; fathers:  $n=68$ , 60.2%), and the median family monthly income ranged from 50,001–100,000 baht (approximately \$1,550–\$3,100 USD). Detailed demographic characteristics are presented in [Table 1](#).

### Correlations between parental stress and child- and family-related factors

Parental stress was most strongly correlated with family dysfunction ( $r=0.51$ ,  $p<0.001$ ), followed by parental ADHD symptoms ( $r=0.41$ ,  $p<0.001$ ) and child functional impairments ( $r=0.39$ ,  $p<0.001$ ). Child ADHD symptoms did not significantly correlate with parental stress ( $r=0.16$ ,  $p=0.065$ ). The correlations among the other variables were also noteworthy ([Table 2](#)). Child ADHD symptoms were strongly correlated with functional impairments ( $r=0.53$ ,  $p<0.001$ ). In turn, functional impairments showed a moderate correlation with family functioning ( $r=0.46$ ,  $p<0.001$ ). Poor family functioning was also significantly positively correlated with both parental ADHD symptoms ( $r=0.39$ ,  $p<0.001$ ) and child ADHD symptoms ( $r=0.20$ ,  $p=0.023$ ).

### Pathway from child ADHD symptoms to parental stress

As shown in [Fig 1](#), child ADHD symptoms was not directly associated with parental stress ( $\beta$  [95% CI] =  $-0.05$  [ $-0.26$ ,  $0.16$ ],  $p=0.634$ ) but indirectly had an influence on parental stress via functional impairment (indirect effect  $\beta$  [95% CI] =  $0.24$  [ $0.11$ ,  $0.38$ ],  $p<0.001$ ). Sensitivity analyses additionally controlling for family income or comorbid specific learning disorder confirmed the significant indirect effect of child ADHD symptoms on parental stress via functional impairment ([S1](#) and [S2 Figs](#)). Analyses restricted to participants with complete data yielded consistent findings ([S3 Fig](#)).

### Pathway from parental ADHD symptoms to parental stress

Parental ADHD symptoms significantly exerted an influence on parental stress both directly ( $\beta$  [95% CI] =  $0.20$  [ $0.05$ ,  $0.35$ ],  $p=0.010$ ) and indirectly via family functioning (indirect effect  $\beta$  [95% CI] =  $0.15$  [ $0.06$ ,  $0.24$ ],  $p=0.001$ ) ([Fig 2](#)). Sensitivity analyses, additionally adjusting for family income and comorbid specific learning disorder, confirmed that both the direct and indirect effects remained significant ([S4](#) and [S5 Figs](#)). Analyses restricted to participants with complete data produced consistent results ([S6 Fig](#)).

### Integrated pathway from ADHD symptoms to parental stress

In the final model incorporating both child- and family-related factors ([Fig 3](#)), parental ADHD symptoms exerted a significant influence on parental stress both directly (direct effect  $\beta$  [95% CI] =  $0.18$  [ $0.02$ ,  $0.33$ ],  $p=0.027$ ) and indirectly via family functioning (indirect effect  $\beta$  [95% CI] =  $0.12$  [ $0.03$ ,  $0.20$ ],  $p=0.006$ ), but not via child functional impairment (indirect effect  $\beta$  [95% CI] =  $0.02$  [ $-0.01$ ,  $0.05$ ],  $p=0.273$ ). Child ADHD symptoms did not significantly influence parental stress neither directly ( $\beta$  [95% CI] =  $-0.04$  [ $-0.22$ ,  $0.15$ ],  $p=0.690$ ) nor indirectly via child functional impairment (indirect effect  $\beta$  [95% CI] =  $0.06$  [ $-0.03$ ,  $0.16$ ],  $p=0.208$ ) or family functioning (indirect effect  $\beta$  [95% CI] =  $0.07$  [ $-0.01$ ,  $0.15$ ],  $p=0.090$ ). Family functioning also had a significant influence on child functional impairment ( $\beta$  [95% CI] =  $0.33$  [ $0.19$ ,  $0.46$ ],  $p<0.001$ ) but did not contribute to parental stress through this pathway (indirect effect  $\beta$  [95% CI] =  $0.04$  [ $-0.02$ ,  $0.11$ ],  $p=0.216$ ) ([Fig 3](#)).

In sensitivity analyses, all models confirmed a significant indirect effect of parental ADHD symptoms on parental stress via family functioning, but not child functional impairment ([S7–S9 Figs](#)). However, the significant direct effect of parental

**Table 1. Sample characteristics.**

| Variable                                                   | Total N | n (%)       |
|------------------------------------------------------------|---------|-------------|
| Child's age, Mean (SD)                                     | 127     | 9.59 (3.3)  |
| Male                                                       | 127     | 90 (70.9)   |
| Informant                                                  | 118     |             |
| Mother                                                     |         | 96 (81.4)   |
| Father                                                     |         | 15 (12.7)   |
| Relatives                                                  |         | 7 (5.9)     |
| Living with                                                | 112     |             |
| Father and mother                                          |         | 66 (58.9)   |
| Mother                                                     |         | 34 (30.4)   |
| Father                                                     |         | 4 (3.6)     |
| Other                                                      |         | 8 (7.1)     |
| Parental marital status                                    | 111     |             |
| Married                                                    |         | 70 (63.1)   |
| Divorced                                                   |         | 22 (19.8)   |
| Separated                                                  |         | 18 (16.2)   |
| Widowed                                                    |         | 1 (0.9)     |
| Paternal age, Mean (SD)                                    | 106     | 42.09 (8.4) |
| Paternal educational level                                 | 113     |             |
| Pre-university education                                   |         | 16 (14.2)   |
| Vocational Certificate/High Vocational Certificate/Diploma |         | 24 (21.2)   |
| Bachelor's degree                                          |         | 54 (47.8)   |
| Postgraduate degree                                        |         | 14 (12.4)   |
| Unknown                                                    |         | 5 (4.4)     |
| Maternal age, Mean (SD)                                    | 112     | 39.36 (6.5) |
| Maternal educational Level                                 | 119     |             |
| Pre-university education                                   |         | 18 (15.1)   |
| Vocational Certificate/High Vocational Certificate/Diploma |         | 13 (10.9)   |
| Bachelor's degree                                          |         | 69 (58.0)   |
| Postgraduate degree                                        |         | 19 (16.0)   |
| Family monthly income                                      | 111     |             |
| < 15,000 baht                                              |         | 7 (6.3)     |
| 15,001–25,000 baht                                         |         | 12 (10.8)   |
| 25,001–50,000 baht                                         |         | 30 (27.0)   |
| 50,001–100,000 baht                                        |         | 46 (41.4)   |
| > 100,000 baht                                             |         | 16 (14.4)   |
| ADHD DSM-5 criteria diagnosis                              | 127     |             |
| Inattention presentation                                   |         | 56 (44.1)   |
| H/I presentation                                           |         | 16 (12.6)   |
| Combined type                                              |         | 55 (43.3)   |
| Comorbidity                                                |         |             |
| SLD                                                        | 117     | 26 (22.2)   |
| ODD                                                        | 117     | 5 (4.3)     |
| ASD                                                        | 117     | 3 (2.6)     |
| Anxiety disorder                                           | 116     | 3 (2.6)     |
| Tic disorders                                              | 116     | 2 (1.7)     |
| Mood disorder                                              | 117     | 1 (0.9)     |

(Continued)

Table 1. (Continued)

| Variable | Total N | n (%)   |
|----------|---------|---------|
| SUD      | 118     | 1 (0.9) |

**Abbreviations:** ADHD, Attention deficit hyperactivity disorder; H/I, Hyperactivity and impulsivity; SLD, Specific learning disorders; ODD, Oppositional defiant disorder; ASD, Autism spectrum disorder; SUD, Substance use disorder.

<https://doi.org/10.1371/journal.pone.0341817.t001>

Table 2. Spearman correlations among parental stress, child ADHD symptoms, child’s functional impairments, family function, and parental ADHD symptoms (N = 127).

|                                | Mean (SD)   | Parental stress | Child ADHD symptoms | Child’s functional impairments | Family function | Parental ADHD |
|--------------------------------|-------------|-----------------|---------------------|--------------------------------|-----------------|---------------|
| Parental stress                | 1.79 (0.53) | 1.000           |                     |                                |                 |               |
| Child ADHD symptoms            | 1.76 (0.50) | 0.16            | 1.000               |                                |                 |               |
| Child’s functional impairments | 0.79 (0.36) | 0.39***         | 0.53***             | 1.000                          |                 |               |
| Family function                | 2.35 (0.60) | 0.51***         | 0.25**              | 0.46***                        | 1.000           |               |
| Parental ADHD                  | 1.13 (0.77) | 0.41***         | 0.20*               | 0.37***                        | 0.39***         | 1.000         |

Abbreviations: ADHD, Attention deficit hyperactivity disorder.

Note: \*p < 0.05; \*\*p < 0.01; \*\*\*p < 0.001.

<https://doi.org/10.1371/journal.pone.0341817.t002>

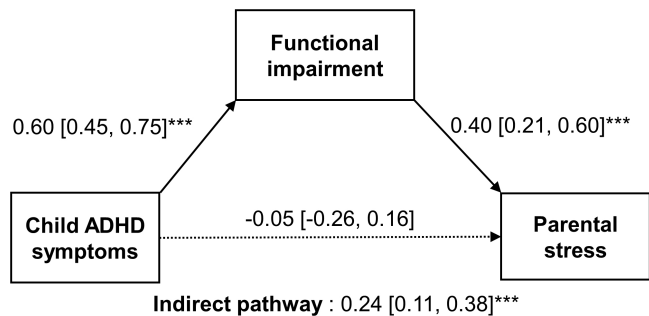

**Fig 1. Path analysis model assessing the effect of child ADHD symptoms on parental stress.** The model was mediated by functional impairment and adjusted for child age and sex. Model fit indices:  $\chi^2(7) = 71.360$ ,  $p < 0.001$ ; Comparative Fit Index (CFI) = 1.000; Root Mean Square Error of Approximation (RMSEA) < 0.001; Standardized Root Mean Square Residual (SRMR) < 0.001. Significant paths are indicated by \*p < 0.05, \*\*p < 0.01, and \*\*\*p < 0.001. Sample size (N) = 127.

<https://doi.org/10.1371/journal.pone.0341817.g001>

ADHD was only confirmed in the model additionally adjusted for specific learning disorder (S8 Fig). The insignificant direct and indirect effects of child ADHD symptoms on parental stress through functional impairment remained consistent across all sensitivity analyses (S7–S9 Figs), but the indirect effect of child ADHD symptoms on parental stress through family functioning became significant in the model additionally adjusted for specific learning disorder (S8 Fig).

## Discussion

This study aimed to elucidate the influences of child-related and family-related factors on parental stress in a clinical sample of children with ADHD. We hypothesized that child functional impairment would be a mediator between child ADHD symptoms and parental stress, whereas family functioning would be a mediator between parental ADHD symptoms and parental stress. The findings partially supported our hypotheses. Specifically, child ADHD symptoms indirectly influenced

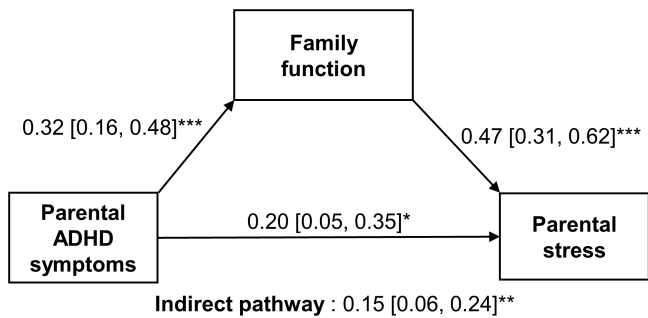

**Fig 2. Path analysis model assessing the effect of parental ADHD symptoms on parental stress.** The model was mediated by family function and adjusted for child's age and sex. The model fit indices are as follows:  $\chi^2(7) = 65.723$ ,  $p < 0.001$ ; Comparative Fit Index (CFI) = 1.000; Root Mean Square Error of Approximation (RMSEA) < 0.001; Standardized Root Mean Square Residual (SRMR) < 0.001. Significant paths are indicated by \* $p < 0.05$ , \*\* $p < 0.01$ , and \*\*\* $p < 0.001$ . Sample size (N) = 127.

<https://doi.org/10.1371/journal.pone.0341817.g002>

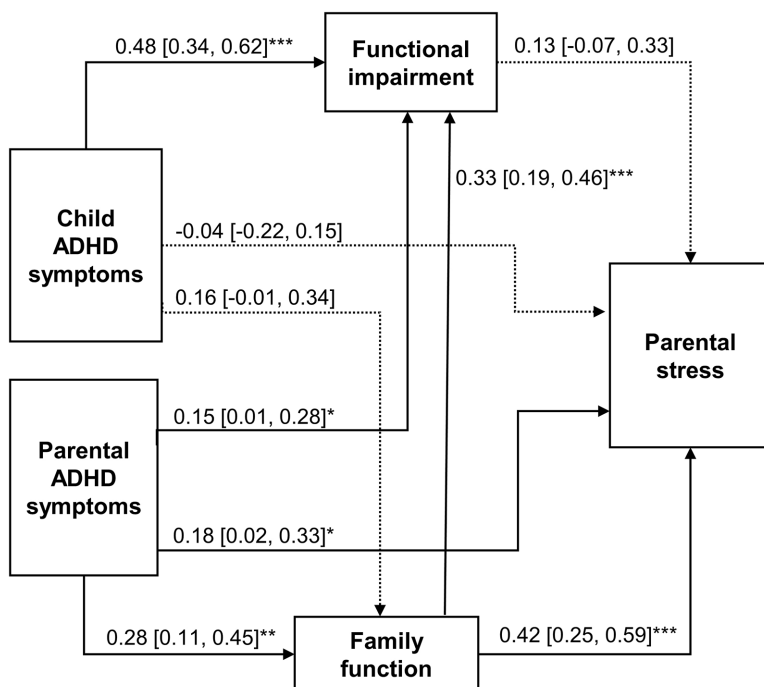

**Indirect pathway**

- Child ADHD symptoms → Functional impairment → Parental stress 0.06 [-0.03, 0.16]
- Child ADHD symptoms → Family function → Parental stress 0.07 [-0.10, 0.15]
- Parental ADHD symptoms → Functional impairment → Parental stress 0.02 [-0.01, 0.05]
- Parental ADHD symptoms → Family function → Parental stress 0.12 [0.03, 0.20]\*\*

**Fig 3. Path analysis model assessing the effects of child and parental ADHD symptoms on parental stress.** The model was mediated by child functional impairment and family functioning and adjusted for child age and sex. Model fit indices were as follows:  $\chi^2(15) = 153.471$ ,  $p < 0.001$ ; Comparative Fit Index (CFI) = 1.000; Root Mean Square Error of Approximation (RMSEA) < 0.001; and Standardized Root Mean Square Residual (SRMR) < 0.001. Significant paths are indicated as \* $p < 0.05$ , \*\* $p < 0.01$ , and \*\*\* $p < 0.001$ . Sample size (N) = 127.

<https://doi.org/10.1371/journal.pone.0341817.g003>

parental stress through child functional impairment, whereas parental ADHD symptoms both directly and indirectly influenced parental stress via family functioning. The mediated pathways remained significant across sensitivity analyses, indicating robustness of the findings. However, when considered concurrently, child functional impairment was no longer significant in mediating the relationship between child ADHD symptoms and parental stress, but parental ADHD symptoms remained directly and indirectly influencing parental stress through family functioning, underscoring the role of family-related factors in shaping perceived stress in parents of children with ADHD.

Focusing on child-related factors, we found that child ADHD symptoms were associated with parental stress primarily through functional impairment rather than a direct pathway. This finding aligns with prior research demonstrating that the impact of a child's ADHD symptoms on parental well-being is often mediated by functional difficulties, including emotional dysregulation, executive functioning deficits, and social or academic challenges [32,33]. Compared to neurotypical peers, children with ADHD face more pronounced impairments in academic performance, peer interactions, and emotional regulation, which consequently increase caregiver burden. Furthermore, parents may experience social discomfort and heightened vigilance in public settings due to their child's unpredictable behaviors [33,55,56]. Such problems may not be fully resolved solely through medical treatment and require psychological and behavioral interventions to improve the child's self-regulation, social skills, and adaptive functioning within the family environment [57–59]. Recent guidelines and reviews emphasize that optimal ADHD management should target both symptoms and functional outcomes [60,61], yet functional impairment is still commonly under-assessed and under-treated in practice. Together with our findings, these pieces of evidence suggest that functional difficulties across multiple settings in the child's life should be assessed and targeted in routine clinical care of children with ADHD to improve the well-being of both children and their parents.

Focusing on family-related factors, we found that both parental ADHD symptoms and poorer family functioning were significantly associated with elevated parental stress, consistent with previous reports [22,34,62,63]. Additionally, our path analysis revealed that, apart from its direct effect, parental ADHD symptoms also exerted an indirect influence on parental stress. Given the high heritability of ADHD, parents of children with the disorder commonly exhibit elevated ADHD symptoms themselves [64–66]. These difficulties—spanning attention, planning, organization, and emotion regulation—can compromise a parent's ability to maintain routines, implement consistent parenting, and adhere to treatment protocols [42,63]. Even subclinical parental ADHD symptoms have been linked to household disorganization and heightened stress [67]. When both parent and child have ADHD, the compounding challenges lead to disrupted routines, reduced intervention efficacy, and increased emotional strain [8,29,68]. The literature also suggests that maternal ADHD, in particular, may be associated with lower use of positive parenting strategies and greater reliance on reactive behaviors, which can weaken secure attachment and create a chaotic home environment that exacerbates child behavioral problems [68–71]. Therefore, screening and managing parental ADHD may be a significant game-changer in reducing caregiver stress and facilitating the implementation of positive parenting strategies, which are essential for supporting optimal developmental outcomes in children with ADHD.

To reflect the interactive nature of a family system, we examined the joint influences of both child- and family-related factors on parental stress in an integrated path model. Consistent with the independent analysis of family-related factors, family functioning not only directly influenced parental stress but also mediated the relationship between parental ADHD symptoms and parental stress. On the contrary, child functional impairment lost its significant direct influence on parental stress and, consequently, no longer mediated the relationship between child ADHD symptoms and parental stress. These findings imply that, in a family system, parental ADHD and the broader quality of family functioning are more influential than child-related factors in shaping parental stress in families affected with ADHD. Prior research has shown that families of children with ADHD often exhibit lower cohesion, poorer communication, higher conflict, and reduced household organization, all of which are known to amplify caregiver stress [34,72–74]. Consequently, interparental conflict, especially concerning child-rearing and behavioral management, can contribute to inconsistent parenting, further aggravating child behavioral problems and marital discord [65]. These difficulties are intensified when a parent also has ADHD [75–79]. Conversely,

engaging in positive family processes, including adaptability, effective communication, and reflective capacity, may serve to mitigate parental stress and promote resilience in caregivers [73]. Taken together, these findings emphasize the importance of family functioning quality and systemic perspectives in managing parental stress in families impacted by ADHD.

### Clinical implications

The present findings provide empirical support that child-focused interventions alone may be insufficient to substantially alleviate parental stress in families of children with ADHD. Instead, a more comprehensive approach that addresses both child- and family-related factors, including parental ADHD symptoms and family functioning, appears critical for optimizing family outcomes. Prior evidence suggests that interventions aimed at improving the quality and efficiency of parent–child interactions, thereby enhancing mutual connectedness, can reduce parental stress [80]. In this regard, parent-focused interventions warrant particular attention. For example, the Improving Parenting Skills for Adults with ADHD (IPSA) program—a manualized, group-based intervention specifically tailored for parents with ADHD—has demonstrated preliminary acceptability, accessibility, and safety, with promising benefits such as enhanced parental self-efficacy, reduced stress, and decreased household chaos [81]. Therefore, integrative therapeutic interventions aiming at managing difficulties in both parents and children in a family system are critically needed to improve the well-being of families affected by ADHD.

### Strengths and limitations

A major strength of this study lies in its integrative framework, which simultaneously examined child- and family-related factors to clarify their contributions to parental stress. Using pathway analysis, we delineated the direct and indirect influences of child and parental ADHD symptoms, providing a deeper understanding of the mechanisms underlying parental stress. These findings offer valuable insights into the multifactorial contributors to parental stress in families affected by ADHD and underscore the importance of interventions that address both child and parental ADHD symptoms and family-level factors.

Several limitations of the present study should be acknowledged. First, our cross-sectional design precludes causal inference, highlighting the need for longitudinal research to clarify the direction and temporal dynamics of the observed associations. Second, as this study aimed to explore the interrelationships between factors associated with parental stress within families affected by ADHD, we did not include neurotypical children as a control group, which limits the comparison of our findings with normative levels of family functioning and parental stress. Third, the registry data used in this study were derived from a single assessment of routine psychiatric service, normally lasting 60–90 minutes, with assurance of comprehensive clinical evaluation for ADHD diagnosis. Therefore, comorbidities that were not evident at the initial encounter may be overlooked or inadequately evaluated due to the time limit. Indeed, the prevalence of comorbid conditions commonly co-occurring with ADHD was low in our dataset, except for specific learning disorder. For this reason, we only additionally adjusted for specific learning disorder in our sensitivity analyses to confirm the robustness of the findings, rather than including it as a separate predictor in the models. Fourth, participants were recruited from a university hospital, and the sample predominantly comprised male children and their mothers from highly educated families, which may limit the generalizability of the findings. Therefore, future studies should recruit larger, diagnostically diverse samples and examine the independent and combined effects of ADHD, as well as common comorbid conditions, on family functioning and parental stress. Finally, the reliance on parent-reported questionnaires introduces the potential for reporter bias. Incorporating multiple informants, including fathers and children’s self-reports, would enable a more comprehensive assessment of family functioning and parental stress.

### Conclusion

This study underscores the dominant role of family-related factors, particularly parental ADHD symptoms and family functioning, in shaping stress among parents of children with ADHD. While child ADHD symptoms indirectly influence parental

stress through functional impairments, parental ADHD symptoms influence parental stress both directly and indirectly via family functioning, which remained significant even when considering both child- and family-related factors simultaneously. These findings provide empirical support for a systemic approach to target not only child symptoms but also associated functional impairment, parental ADHD, and family functioning to improve the well-being of families impacted by ADHD.

## Supporting information

**S1 Table. Characteristics of the included and excluded samples in this study.**

(DOCX)

**S1 Fig. Sensitivity analysis additionally adjusted for family income, assessing the paths from child ADHD symptoms to parental stress.**

(DOCX)

**S2 Fig. Sensitivity analysis additionally adjusted for comorbid specific learning disorder, assessing the paths from child ADHD symptoms to parental stress.**

(DOCX)

**S3 Fig. Sensitivity analysis in a sample with complete data, assessing the paths from child ADHD symptoms to parental stress.**

(DOCX)

**S4 Fig. Sensitivity analysis additionally adjusted for family income, assessing the paths from parental ADHD symptoms to parental stress.**

(DOCX)

**S5 Fig. Sensitivity analysis additionally adjusted for comorbid specific learning disorder, assessing the paths from parental ADHD symptoms to parental stress.**

(DOCX)

**S6 Fig. Sensitivity analysis using a sample with complete data, assessing the paths from parental ADHD symptoms to parental stress.**

(DOCX)

**S7 Fig. Sensitivity analysis additionally adjusted for family income, assessing the paths from child and parental ADHD symptoms to parental stress.**

(DOCX)

**S8 Fig. Sensitivity analysis additionally adjusted for comorbid specific learning disorder, assessing the paths from child and parental ADHD symptoms to parental stress.**

(DOCX)

**S9 Fig. Sensitivity analysis using a sample with complete data, assessing the paths from child and parental ADHD symptoms to parental stress.**

(DOCX)

## Acknowledgments

We express our gratitude to Assoc. Prof. Nida Limsuwan for granting access to the ADHD Registry and to the children and families at Ramathibodi Hospital, Bangkok, for their participation, which made this study possible.

## Author contributions

**Conceptualization:** Thanavadee Prachason, Komsan Kiatrungrit, Masatha Thongpan, Passaporn Lorterapong, Nida Limsuwan.

**Data curation:** Thanavadee Prachason, Komsan Kiatrungrit, Masatha Thongpan, Passaporn Lorterapong, Pattarabhorn Wisajun, Sudawan Jullagate, Nida Limsuwan.

**Formal analysis:** Nitchawan Jongrakthanakij, Thanavadee Prachason.

**Investigation:** Nitchawan Jongrakthanakij, Thanavadee Prachason, Masatha Thongpan, Nida Limsuwan.

**Methodology:** Nitchawan Jongrakthanakij, Thanavadee Prachason.

**Project administration:** Nida Limsuwan.

**Visualization:** Nitchawan Jongrakthanakij, Thanavadee Prachason.

**Writing – original draft:** Nitchawan Jongrakthanakij.

**Writing – review & editing:** Nitchawan Jongrakthanakij, Thanavadee Prachason, Komsan Kiatrungrit, Nida Limsuwan.

## References

- Salari N, Ghasemi H, Abdoli N, Rahmani A, Shiri MH, Hashemian AH, et al. The global prevalence of ADHD in children and adolescents: a systematic review and meta-analysis. *Ital J Pediatr.* 2023;49(1):48. <https://doi.org/10.1186/s13052-023-01456-1> PMID: 37081447
- Sharma A, Couture J. A review of the pathophysiology, etiology, and treatment of attention-deficit hyperactivity disorder (ADHD). *Ann Pharmacother.* 2014;48(2):209–25. <https://doi.org/10.1177/1060028013510699> PMID: 24259638
- Austerman J. ADHD and behavioral disorders: Assessment, management, and an update from DSM-5. *Cleve Clin J Med.* 2015;82(11 Suppl 1):S2–7. <https://doi.org/10.3949/ccjm.82.s1.01> PMID: 26555810
- Deater-Deckard K. Parenting stress and child adjustment: Some old hypotheses and new questions. *Clinical Psychology: Science and Practice.* 1998;5(3):314–32. <https://doi.org/10.1111/j.1468-2850.1998.tb00152.x>
- Crnica KA, Greenberg MT. Minor parenting stresses with young children. *Child Dev.* 1990;61(5):1628–37. <https://doi.org/10.1111/j.1467-8624.1990.tb02889.x> PMID: 2245752
- Abidin RR. The Determinants of Parenting Behavior. *Journal of Clinical Child Psychology.* 1992;21(4):407–12. [https://doi.org/10.1207/s15374424jccp2104\\_12](https://doi.org/10.1207/s15374424jccp2104_12)
- Rodgers AY. Multiple sources of stress and parenting behavior. *Children and Youth Services Review.* 1998;20(6):525–46. [https://doi.org/10.1016/s0190-7409\(98\)00022-x](https://doi.org/10.1016/s0190-7409(98)00022-x)
- Theule J, Wiener J, Rogers MA, Marton I. Predicting Parenting Stress in Families of Children with ADHD: Parent and Contextual Factors. *J Child Fam Stud.* 2010;20(5):640–7. <https://doi.org/10.1007/s10826-010-9439-7>
- Barańczuk U, Pisula E. Parental stress and symptoms of depression: a preliminary report. *Int J Dev Disabil.* 2020;68(4):445–53. <https://doi.org/10.1080/20473869.2020.1797450> PMID: 35937167
- Fang Y, Luo J, Boele M, Windhorst D, van Grieken A, Raat H. Parent, child, and situational factors associated with parenting stress: a systematic review. *Eur Child Adolesc Psychiatry.* 2024;33(6):1687–705. <https://doi.org/10.1007/s00787-022-02027-1> PMID: 35876894
- Jones TL, Prinz RJ. Potential roles of parental self-efficacy in parent and child adjustment: a review. *Clin Psychol Rev.* 2005;25(3):341–63. <https://doi.org/10.1016/j.cpr.2004.12.004> PMID: 15792853
- Cousino MK, Hazen RA. Parenting stress among caregivers of children with chronic illness: a systematic review. *J Pediatr Psychol.* 2013;38(8):809–28. <https://doi.org/10.1093/jpepsy/jst049> PMID: 23843630
- Fang Y, Boelens M, Windhorst DA, Raat H, van Grieken A. Factors associated with parenting self-efficacy: A systematic review. *J Adv Nurs.* 2021;77(6):2641–61. <https://doi.org/10.1111/jan.14767> PMID: 33590585
- Johnston C, Mash EJ. Families of children with attention-deficit/hyperactivity disorder: review and recommendations for future research. *Clin Child Fam Psychol Rev.* 2001;4(3):183–207. <https://doi.org/10.1023/a:1017592030434> PMID: 11783738
- Theule J, Wiener J, Tannock R, Jenkins JM. Parenting Stress in Families of Children With ADHD. *Journal of Emotional and Behavioral Disorders.* 2010;21(1):3–17. <https://doi.org/10.1177/1063426610387433>
- Leitch S, Sciberras E, Post B, Gerner B, Rinehart N, Nicholson JM, et al. Experience of stress in parents of children with ADHD: A qualitative study. *Int J Qual Stud Health Well-being.* 2019;14(1):1690091. <https://doi.org/10.1080/17482631.2019.1690091> PMID: 31713473
- Ching'oma CD, Mkoka DA, Ambikile JS, Iseselo MK. Experiences and challenges of parents caring for children with attention-deficit hyperactivity disorder: A qualitative study in Dar es salaam, Tanzania. *PLoS One.* 2022;17(8):e0267773. <https://doi.org/10.1371/journal.pone.0267773> PMID: 35921363

18. Zeng S, Yuan L, Lee Y, Guan Y, Volk K, O'Riordan M, et al. Parental stress in raising a child with mental health and behavior problems. In: Matson JL, editor. *Handbook of clinical child psychology: Integrating theory and research into practice*. Cham: Springer International Publishing; 2023. p. 137–54.
19. Alghamdi T, Helou M, Jeyaseelan L, Sultan MA. Stress Level of Parents of Children Diagnosed with Attention-deficit/ Hyperactivity Disorder (ADHD) in Dubai, United Arab Emirates. *NEMJ*. 2023;4(2). <https://doi.org/10.2174/04666230317110616>
20. Anastopoulos AD, Guevremont DC, Shelton TL, DuPaul GJ. Parenting stress among families of children with attention deficit hyperactivity disorder. *J Abnorm Child Psychol*. 1992;20(5):503–20. <https://doi.org/10.1007/BF00916812> PMID: 1487593
21. Narkunam N, Hashim AH, Sachdev MK, Pillai SK, Ng CG. Stress among parents of children with attention deficit hyperactivity disorder, a Malaysian experience. *Asia Pac Psychiatry*. 2014;6(2):207–16. <https://doi.org/10.1111/j.1758-5872.2012.00216.x> PMID: 23857633
22. Muñoz-Silva A, Lago-Urbano R, Sanchez-Garcia M, Carmona-Márquez J. Child/Adolescent's ADHD and Parenting Stress: The Mediating Role of Family Impact and Conduct Problems. *Front Psychol*. 2017;8:2252. <https://doi.org/10.3389/fpsyg.2017.02252> PMID: 29312090
23. Peñuelas-Calvo I, Palomar-Ciria N, Porras-Segovia A, Miguélez-Fernández C, Baltasar-Tello I, Colmenero SP-, et al. Impact of ADHD symptoms on family functioning, family burden and parents' quality of life in a hospital area in Spain. *The European Journal of Psychiatry*. 2021;35(3):166–72. <https://doi.org/10.1016/j.ejpsy.2020.10.003>
24. Setiawati Y, Hartopo D, Rabitho FD, Chuanardi W. Investigating Attention Deficit Hyperactivity Disorder Symptoms, Emotional Dysregulation and Family Functioning in Children: A Community-Based Study in Elementary Schools in Surabaya, Indonesia. *J Korean Acad Child Adolesc Psychiatry*. 2024;35(4):250–7. <https://doi.org/10.5765/jkacap.240015> PMID: 39380565
25. Olczyk AR, Rosen PJ, Alacha HF, Flynn MM. Indirect effect of ADHD on parenting stress through increased child anxiety and decreased emotional regulatory coping. *Eur Child Adolesc Psychiatry*. 2024;33(5):1407–17. <https://doi.org/10.1007/s00787-023-02246-0> PMID: 37351660
26. Harpin VA. The effect of ADHD on the life of an individual, their family, and community from preschool to adult life. *Arch Dis Child*. 2005;90 Suppl 1(Suppl 1):i2-7. <https://doi.org/10.1136/adc.2004.059006> PMID: 15665153
27. Anastopoulos AD, Sommer JL, Schatz NK. ADHD and family functioning. *Curr Atten Disord Rep*. 2009;1(4):167–70. <https://doi.org/10.1007/s12618-009-0023-2>
28. Bhide S, Efron D, Ukoumunne OC, Anderson V, Nicholson JM, Silk T, et al. Family Functioning in Children With ADHD and Subthreshold ADHD: A 3-Year Longitudinal Study. *J Atten Disord*. 2024;28(4):480–92. <https://doi.org/10.1177/10870547231217089> PMID: 38084374
29. Wiener J, Biondic D, Grimbos T, Herbert M. Parenting Stress of Parents of Adolescents with Attention-Deficit Hyperactivity Disorder. *J Abnorm Child Psychol*. 2016;44(3):561–74. <https://doi.org/10.1007/s10802-015-0050-7> PMID: 26183609
30. Park JL, Hudec KL, Johnston C. Parental ADHD symptoms and parenting behaviors: A meta-analytic review. *Clin Psychol Rev*. 2017;56:25–39. <https://doi.org/10.1016/j.cpr.2017.05.003> PMID: 28601690
31. Adamis D, Flynn C, Wrigley M, Gavin B, McNicholas F. ADHD in Adults: A Systematic Review and Meta-Analysis of Prevalence Studies in Outpatient Psychiatric Clinics. *J Atten Disord*. 2022;26(12):1523–34. <https://doi.org/10.1177/10870547221085503> PMID: 35373645
32. Graziano PA, McNamara JP, Geffken GR, Reid A. Severity of children's ADHD symptoms and parenting stress: a multiple mediation model of self-regulation. *J Abnorm Child Psychol*. 2011;39(7):1073–83. <https://doi.org/10.1007/s10802-011-9528-0> PMID: 21629991
33. Cheesman J. Raising an ADHD child: relations between parental stress, child functional impairment, and subtypes of the disorder [dissertation]. Cape town: University of Cape Town; 2011.
34. Janprasert N, Limsuwan N. Family functioning and caregiver stress in attention-deficit/ hyperactivity disorder (ADHD) comparing to non-chronic physical illness. *J Psychiatr Assoc Thailand*. 2024;69(2):160–8.
35. American Psychiatric Association. *Diagnostic and Statistical Manual of Mental Disorders*. 5th ed. Arlington: American Psychiatric Association; 2013.
36. Cohen S, Kamarck T, Mermelstein R. A Global Measure of Perceived Stress. *Journal of Health and Social Behavior*. 1983;24(4):385. <https://doi.org/10.2307/2136404>
37. Wongpakaran N, Wongpakaran T. The Thai version of the PSS-10: An Investigation of its psychometric properties. *Biopsychosoc Med*. 2010;4:6. <https://doi.org/10.1186/1751-0759-4-6> PMID: 20540784
38. Swanson J, Lerner M, March J, Gresham FM. Assessment and intervention for attention-deficit/hyperactivity disorder in the schools. Lessons from the MTA study. *Pediatr Clin North Am*. 1999;46(5):993–1009. [https://doi.org/10.1016/s0031-3955\(05\)70168-1](https://doi.org/10.1016/s0031-3955(05)70168-1) PMID: 10570701
39. Swanson JM, Kraemer HC, Hinshaw SP, Arnold LE, Conners CK, Abikoff HB, et al. Clinical relevance of the primary findings of the MTA: success rates based on severity of ADHD and ODD symptoms at the end of treatment. *J Am Acad Child Adolesc Psychiatry*. 2001;40(2):168–79. <https://doi.org/10.1097/00004583-200102000-00011> PMID: 11211365
40. The MTA Cooperative Group. Moderators and mediators of treatment response for children with attention-deficit/hyperactivity disorder: the Multimodal Treatment Study of children with Attention-deficit/hyperactivity disorder. *Arch Gen Psychiatry*. 1999;56(12):1088–96. <https://doi.org/10.1001/archpsyc.56.12.1088> PMID: 10591284
41. Pityaratstian N, Booranasuksakul T, Juengsiragulwit D, Benyakorn S. ADHD screening properties of the Thai version of Swanson, Nolan, and Pelham IV scale (SNAP-IV) and Strengths and Difficulties Questionnaire (SDQ). *J Psychiatr Assoc Thailand*. 2014;59(2):97–110.
42. Weiss MD, McBride NM, Craig S, Jensen P. Conceptual review of measuring functional impairment: findings from the Weiss Functional Impairment Rating Scale. *Evid Based Ment Health*. 2018;21(4):155–64. <https://doi.org/10.1136/ebmental-2018-300025> PMID: 30314990

43. Punyapas S, Pornnoppadol C, Boon-yasidhi V, Likhitkiatikhachorn P. Reliability and validity of Weiss functional impairment rating scale (WFIRS)-Thai version in children and adolescents with attention deficit hyperactivity disorder. *J Psychiatr Assoc Thailand*. 2015;60(2):111–26.
44. Carr A, Stratton P. The Score Family Assessment Questionnaire: A Decade of Progress. *Fam Process*. 2017;56(2):285–301. <https://doi.org/10.1111/famp.12280> PMID: 28205204
45. Limsuwan N, Prachason T. The reliability and validity of the 15-item Systemic Clinical Outcome and Routine Evaluation (SCORE-15) Thai version. *Journal of Family Therapy*. 2018;42(1):119–28. <https://doi.org/10.1111/1467-6427.12248>
46. Limsuwan N, Prachason T. Psychometric properties of the SCORE-15 Thai version and its relationship with mental health index. *Journal of Family Therapy*. 2021;44(2):299–312. <https://doi.org/10.1111/1467-6427.12347>
47. Kessler RC, Adler L, Ames M, Demler O, Faraone S, Hiripi E, et al. The World Health Organization Adult ADHD Self-Report Scale (ASRS): a short screening scale for use in the general population. *Psychol Med*. 2005;35(2):245–56. <https://doi.org/10.1017/s0033291704002892> PMID: 15841682
48. Kessler RC, Adler LA, Barkley R, Biederman J, Conners CK, Faraone SV, et al. Patterns and predictors of attention-deficit/hyperactivity disorder persistence into adulthood: results from the national comorbidity survey replication. *Biol Psychiatry*. 2005;57(11):1442–51. <https://doi.org/10.1016/j.biopsych.2005.04.001> PMID: 15950019
49. Kessler RC, Adler LA, Gruber MJ, Sarawate CA, Spencer T, Van Brunt DL. Validity of the World Health Organization Adult ADHD Self-Report Scale (ASRS) Screener in a representative sample of health plan members. *Int J Methods Psychiatr Res*. 2007;16(2):52–65. <https://doi.org/10.1002/mpr.208> PMID: 17623385
50. Kiatrungrit K, Putthisri S, Hongsanguansri S, Wisajan P, Jullagate S. Validity and Reliability of Adult ADHD Self-Report Scale Thai Version (ASRS-V1.1 TH). *Shanghai Arch Psychiatry*. 2017;29(4):218–27. <https://doi.org/10.11919/j.issn.1002-0829.217021> PMID: 28955141
51. Pressman LJ, Loo SK, Carpenter EM, Asarnow JR, Lynn D, McCracken JT, et al. Relationship of family environment and parental psychiatric diagnosis to impairment in ADHD. *J Am Acad Child Adolesc Psychiatry*. 2006;45(3):346–54. <https://doi.org/10.1097/01.chi.0000192248.61271.c8> PMID: 16540820
52. Hu L, Bentler PM. Cutoff criteria for fit indexes in covariance structure analysis: Conventional criteria versus new alternatives. *Structural Equation Modeling: A Multidisciplinary Journal*. 1999;6(1):1–55. <https://doi.org/10.1080/10705519909540118>
53. UCLA:Statistical Consulting Group [Internet]. A Practical Introduction to Factor Analysis: Confirmatory Factor Analysis [cited 2025 April 4]. Available from: <https://stats.oarc.ucla.edu/r/seminars/rca/#s3>
54. Kline RB. *Principles and Practice of Structural Equation Modeling*. 5th ed. New York: The Guilford Press; 2023.
55. Usami M. Functional consequences of attention-deficit hyperactivity disorder on children and their families. *Psychiatry Clin Neurosci*. 2016;70(8):303–17. <https://doi.org/10.1111/pcn.12393> PMID: 27061213
56. Jung E, Lee T, Kim J, Kim H-W. Children's and Parents' Factors That Affect Parenting Stress in Preschool Children With Developmental Disabilities or Typical Development. *Psychiatry Investig*. 2023;20(12):1157–67. <https://doi.org/10.30773/pi.2023.0223> PMID: 38163655
57. Sasser T, Schoenfelder EN, Stein MA. Targeting Functional Impairments in the Treatment of Children and Adolescents with ADHD. *CNS Drugs*. 2017;31(2):97–107. <https://doi.org/10.1007/s40263-016-0400-1> PMID: 27943133
58. Weiss M, Childress A, Mattingly G, Nordbrock E, Kupper RJ, Adjei AL. Relationship Between Symptomatic and Functional Improvement and Remission in a Treatment Response to Stimulant Trial. *J Child Adolesc Psychopharmacol*. 2018;28(8):521–9. <https://doi.org/10.1089/cap.2017.0166> PMID: 30036076
59. Coghill DR, Banaschewski T, Soutullo C, Cottingham MG, Zuddas A. Systematic review of quality of life and functional outcomes in randomized placebo-controlled studies of medications for attention-deficit/hyperactivity disorder. *Eur Child Adolesc Psychiatry*. 2017;26(11):1283–307. <https://doi.org/10.1007/s00787-017-0986-y> PMID: 28429134
60. Weiss MD. A Paradigm for Targeting Functional Impairment as an Outcome in Attention-Deficit/Hyperactivity Disorder. *Brain Sci*. 2022;12(8):1014. <https://doi.org/10.3390/brainsci12081014> PMID: 36009077
61. Coghill D, Banaschewski T, Cortese S, Asherson P, Brandeis D, Buitelaar J, et al. The management of ADHD in children and adolescents: bringing evidence to the clinic: perspective from the European ADHD Guidelines Group (EAGG). *Eur Child Adolesc Psychiatry*. 2023;32(8):1337–61. <https://doi.org/10.1007/s00787-021-01871-x> PMID: 34677682
62. Williamson D, Johnston C. Maternal ADHD Symptoms and Parenting Stress: The Roles of Parenting Self-Efficacy Beliefs and Neuroticism. *J Atten Disord*. 2019;23(5):493–505. <https://doi.org/10.1177/1087054717693373> PMID: 28201945
63. Davidsson M, Oldmark M, Hagberg B, Gillberg C, Billstedt E. Parenting Stress and Neurodevelopmental Disorders: the Associations of Parental Factors and Child Psychosocial Functioning. *J Child Fam Stud*. 2025;34(4):883–94. <https://doi.org/10.1007/s10826-025-03042-x>
64. Faraone SV. Genetics of adult attention-deficit/hyperactivity disorder. *Psychiatr Clin North Am*. 2004;27(2):303–21. [https://doi.org/10.1016/S0193-953X\(03\)00090-X](https://doi.org/10.1016/S0193-953X(03)00090-X) PMID: 15063999
65. Johnston C, Chronis-Tuscano A. Families and ADHD. In: Barkley RA, editor. *Attention-deficit hyperactivity disorder: a handbook for diagnosis and treatment*. 4th ed. New York: The Guilford Press; 2015. p. 191–209.
66. Starck M, Grünwald J, Schlarb AA. Occurrence of ADHD in parents of ADHD children in a clinical sample. *Neuropsychiatr Dis Treat*. 2016;12:581–8. <https://doi.org/10.2147/NDT.S100238> PMID: 27042071

67. Mokrova I, O'Brien M, Calkins S, Keane S. Parental ADHD Symptomology and Ineffective Parenting: The Connecting Link of Home Chaos. *Parent Sci Pract*. 2010;10(2):119–35. <https://doi.org/10.1080/15295190903212844> PMID: [20454604](https://pubmed.ncbi.nlm.nih.gov/20454604/)
68. Asherson P, Akehurst R, Kooij JJS, Huss M, Beusterien K, Sasané R, et al. Under diagnosis of adult ADHD: cultural influences and societal burden. *J Atten Disord*. 2012;16(5 Suppl):20S-38S. <https://doi.org/10.1177/1087054711435360> PMID: [22377849](https://pubmed.ncbi.nlm.nih.gov/22377849/)
69. Weiss M, Hechtman L, Weiss G. ADHD in parents. *J Am Acad Child Adolesc Psychiatry*. 2000;39(8):1059–61. <https://doi.org/10.1097/00004583-200008000-00023> PMID: [10939236](https://pubmed.ncbi.nlm.nih.gov/10939236/)
70. Sonuga-Barke EJS, Daley D, Thompson M. Does maternal ADHD reduce the effectiveness of parent training for preschool children's ADHD? *J Am Acad Child Adolesc Psychiatry*. 2002;41(6):696–702. <https://doi.org/10.1097/00004583-200206000-00009> PMID: [12049444](https://pubmed.ncbi.nlm.nih.gov/12049444/)
71. Chronis AM, Lahey BB, Pelham WE Jr, Kipp HL, Baumann BL, Lee SS. Psychopathology and substance abuse in parents of young children with attention-deficit/hyperactivity disorder. *J Am Acad Child Adolesc Psychiatry*. 2003;42(12):1424–32. <https://doi.org/10.1097/00004583-200312000-00009> PMID: [14627877](https://pubmed.ncbi.nlm.nih.gov/14627877/)
72. Jetiyanuwat S, Kawilapat S, Narkpongphun A, Pojanapotha P. Association between Family Functioning, Child Emotional and Behavioral Problems, and Parental Stress during the COVID-19 Pandemic in Thailand. *Behav Sci (Basel)*. 2024;14(4):270. <https://doi.org/10.3390/bs14040270> PMID: [38667066](https://pubmed.ncbi.nlm.nih.gov/38667066/)
73. León E, Palacios J, Román M, Moreno C, Peñarubia MG. Parental stress, family functioning and children's psychological adjustment in adoptive families: A comparative and longitudinal study. *Family Science*. 2015;6(1):50–7. <https://doi.org/10.1080/19424620.2015.1080991>
74. Young ME, Galvan T, Reidy BL, Pescosolido MF, Kim KL, Seymour K, et al. Family functioning deficits in bipolar disorder and ADHD in youth. *J Affect Disord*. 2013;150(3):1096–102. <https://doi.org/10.1016/j.jad.2013.04.027> PMID: [23706879](https://pubmed.ncbi.nlm.nih.gov/23706879/)
75. Biederman J, Faraone SV, Monuteaux MC. Impact of exposure to parental attention-deficit hyperactivity disorder on clinical features and dysfunction in the offspring. *Psychol Med*. 2002;32(5):817–27. <https://doi.org/10.1017/s0033291702005652> PMID: [12171376](https://pubmed.ncbi.nlm.nih.gov/12171376/)
76. Eakin L, Minde K, Hechtman L, Ochs E, Krane E, Bouffard R, et al. The marital and family functioning of adults with ADHD and their spouses. *J Atten Disord*. 2004;8(1):1–10. <https://doi.org/10.1177/108705470400800101> PMID: [15669597](https://pubmed.ncbi.nlm.nih.gov/15669597/)
77. Ben-Naim S, Marom I, Krashin M, Gifter B, Arad K. Life With a Partner with ADHD: The Moderating Role of Intimacy. *J Child Fam Stud*. 2017;26(5):1365–73. <https://doi.org/10.1007/s10826-016-0653-9>
78. Ersoy MA, Topçu Ersoy H. Gender-Role Attitudes Mediate the Effects of Adult ADHD on Marriage and Relationships. *J Atten Disord*. 2019;23(1):40–50. <https://doi.org/10.1177/1087054715618789> PMID: [26689937](https://pubmed.ncbi.nlm.nih.gov/26689937/)
79. Kroeger RA. Childhood mental health and adult family relationships: How ADHD shapes experiences with intimate unions and parenthood. *Sociology Compass*. 2021;15(4). <https://doi.org/10.1111/soc4.12865>
80. Golfenshtein N, Srulovici E, Deatrick JA. Interventions for Reducing Parenting Stress in Families With Pediatric Conditions: An Integrative Review. *J Fam Nurs*. 2016;22(4):460–92. <https://doi.org/10.1177/1074840716676083> PMID: [27821622](https://pubmed.ncbi.nlm.nih.gov/27821622/)
81. Lindström T, Buddgård S, Westholm L, Forster M, Bölte S, Hirvikoski T. Parent Training Tailored to Parents With ADHD: Development of the Improving Parenting Skills Adult ADHD (IPSA) Program. *J Atten Disord*. 2024;28(4):531–41. <https://doi.org/10.1177/10870547231217090> PMID: [38152999](https://pubmed.ncbi.nlm.nih.gov/38152999/)
